# Supplementary material for: Bacteriophage nanofiber fabrication using near field electrospinning
Source: Royal Society of Chemistry journal article supplement (doi:10.1039/c9ra07510k), 2019-01-01
Supplement: c9ra07510k1.pdf [file c9ra07510k1.pdf]

**Supporting Materials**

**Bacteriophage Nanofiber Fabrication Using Near Field Electrospinning**

**Ryota Sugimoto<sup>a,b</sup>, Ju Hun Lee<sup>a,b,1</sup>, Ju-Hyuck Lee<sup>a,b,2</sup>, Hyo-Eon Jin <sup>a,b,3</sup>, So-Young Yoo<sup>d,\*</sup>,  
and Seung-Wuk Lee<sup>a,b,c\*</sup>**

*<sup>a</sup> Department of Bioengineering, University of California at Berkeley, Berkeley, CA, 94720, USA.*

*<sup>b</sup> Biological Systems and Engineering, Lawrence Berkeley National Laboratory, Berkeley, CA  
94720*

*<sup>c</sup> Tsinghua Berkeley Shenzhen Institute, Berkeley, USA*

*<sup>d</sup>BIO-IT Foundry Technology Institute Pusan National University Busan 609-735, and  
Research Institute for Convergence of Biomedical Science and Technology Yangsan 626-770,  
Republic of Korea.*

*\*Corresponding authors: [yoosy@pusan.ac.kr](mailto:yoosy@pusan.ac.kr) & [leesw@berkeley.edu](mailto:leesw@berkeley.edu)*

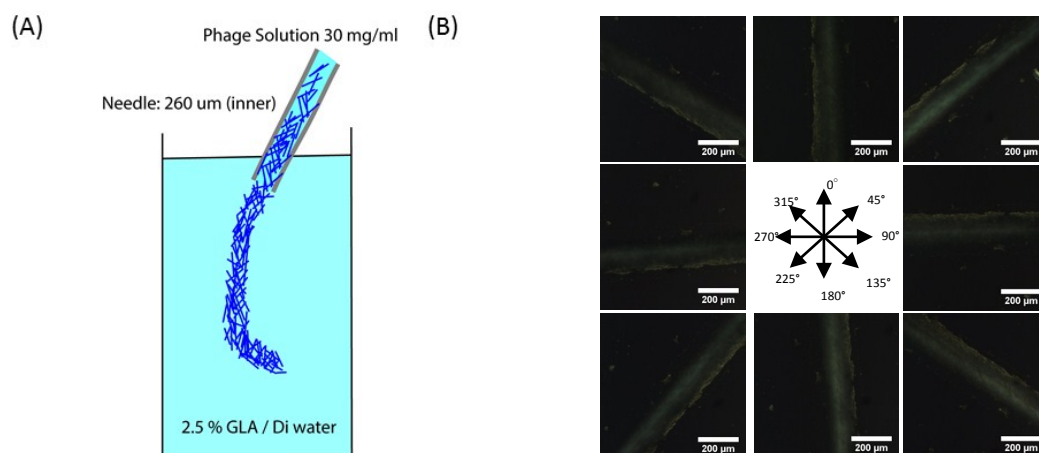

Figure S1. (A) Schematic of the phage wet spinning. (B) Polarized microscope image of a wet spun fiber

**Figure S1. Wet spinning of M13 phage.** **A.** Schematic of wet spun phage fiber fabrication. Phage solution (30 mg/ml with 50 mM TBS/ DIW) was extruded into 2.5 % glutaraldehyde/DIW solution. **B.** Polarized optical microscopy images of the wet-spun phages. These images show nonspecific orientation of crystalline structure resulted by phage wet spinning.

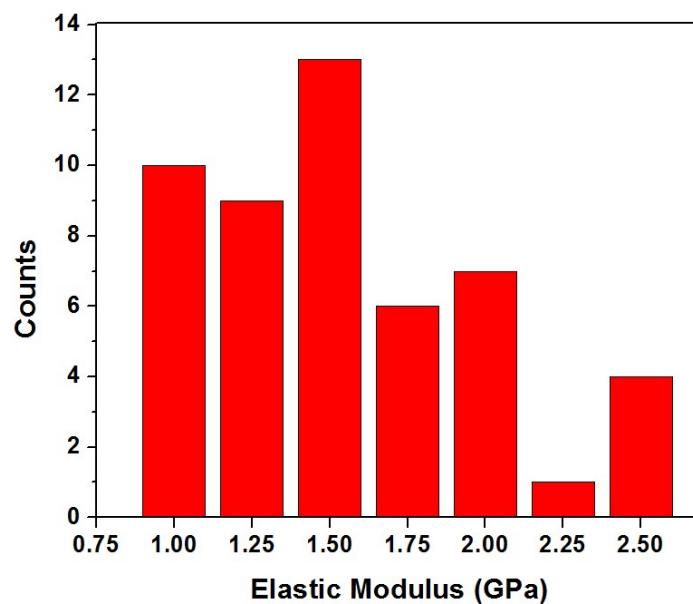

**Figure S2. Elastic modulus of electrospun phage fibers.** The distribution of the elastic modulus of electro spun phage nanofibers. The force-indentation data was collected from 50 different points in five phage electrospun fibers using AFM nanoindentation method. The elastic modulus was calculated by Oliver-Pharr model.
